# Supplementary material
Source: PubMed Central journal article supplement (PMC1450190)

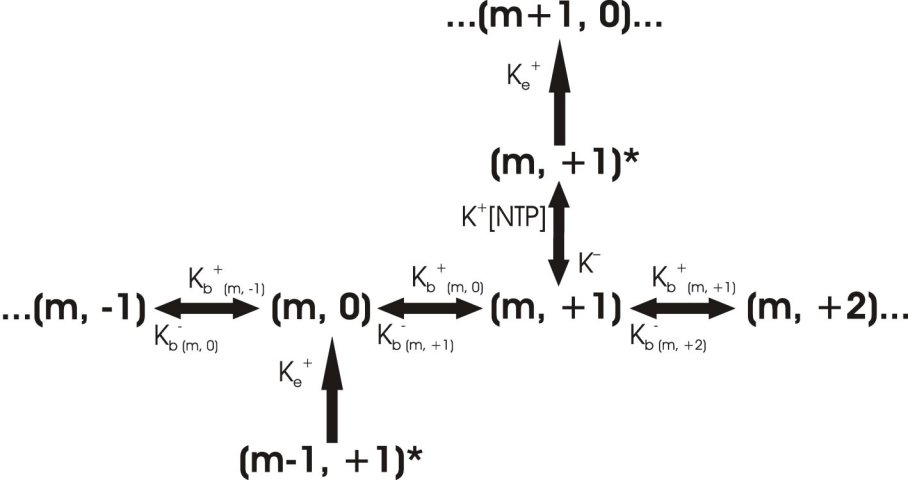

Supplement: pnas_0600508103_2.pdf [file pnas_0600508103_2.pdf]
